# Supplementary figures and images for: Targeting the 16S rRNA Gene for Bacterial Identification in Complex Mixed Samples: Comparative Evaluation of Second (Illumina) and Third (Oxford Nanopore Technologies) Generation Sequencing Technologies
Source: MDPI journal article supplement (doi:10.3390/ijms21010298), 2019-12-31

**A**

### Correctly classified reads - SILVA

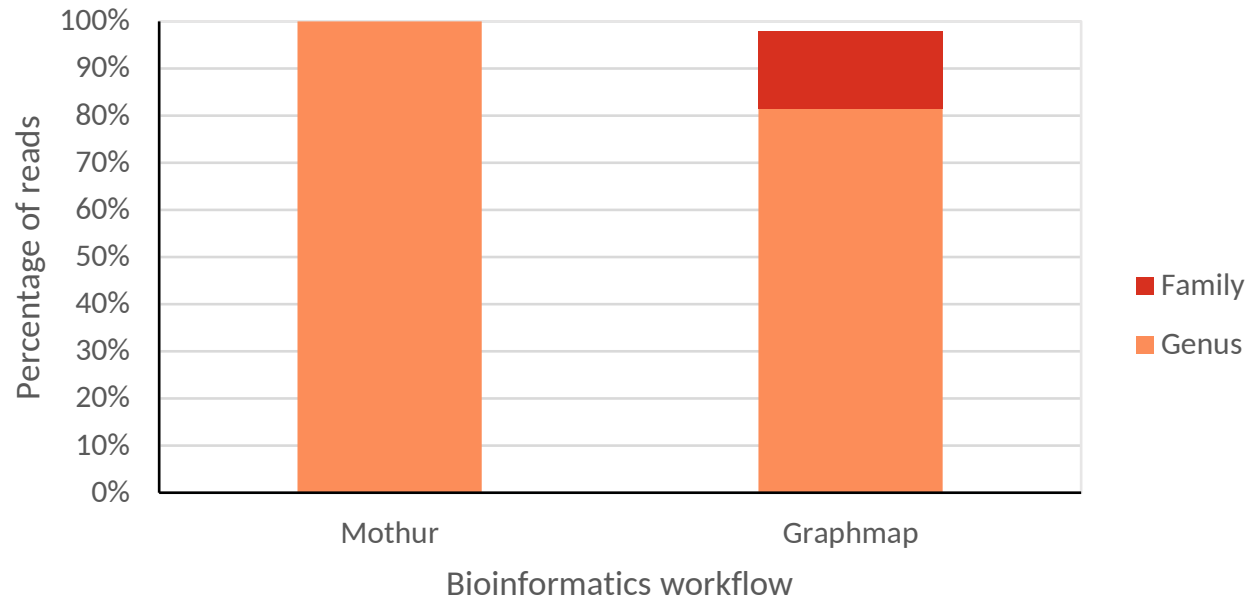**B**

### Correctly classified reads - NCBI 16S

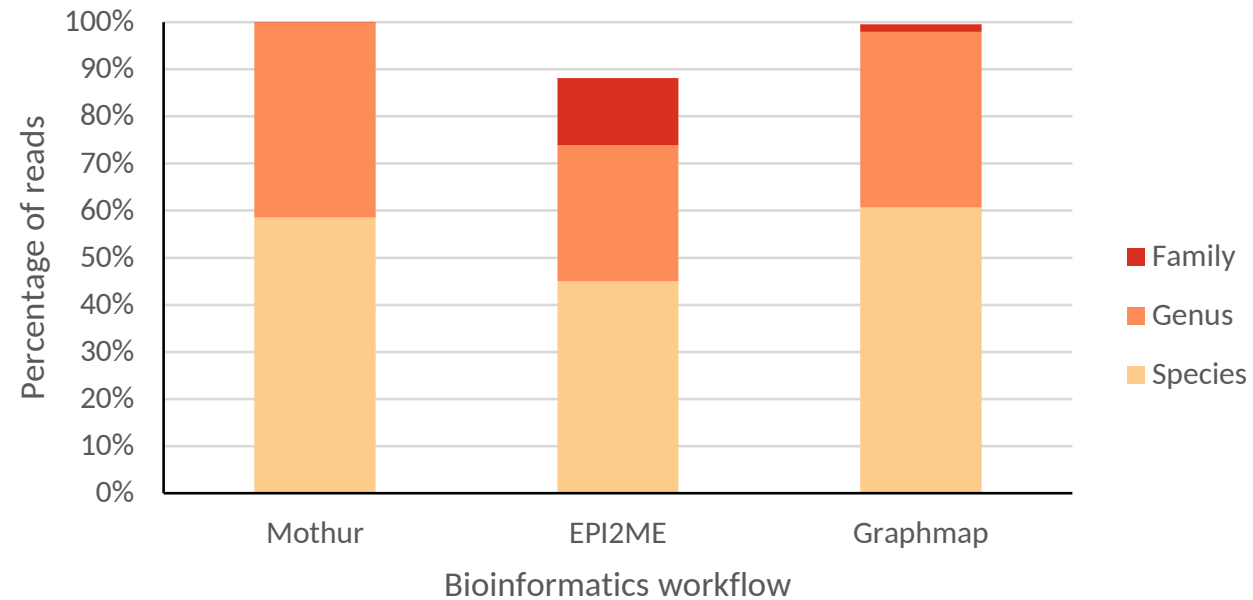

Supplement: s1 [file s1]

A

Correctly classified reads - SILVA

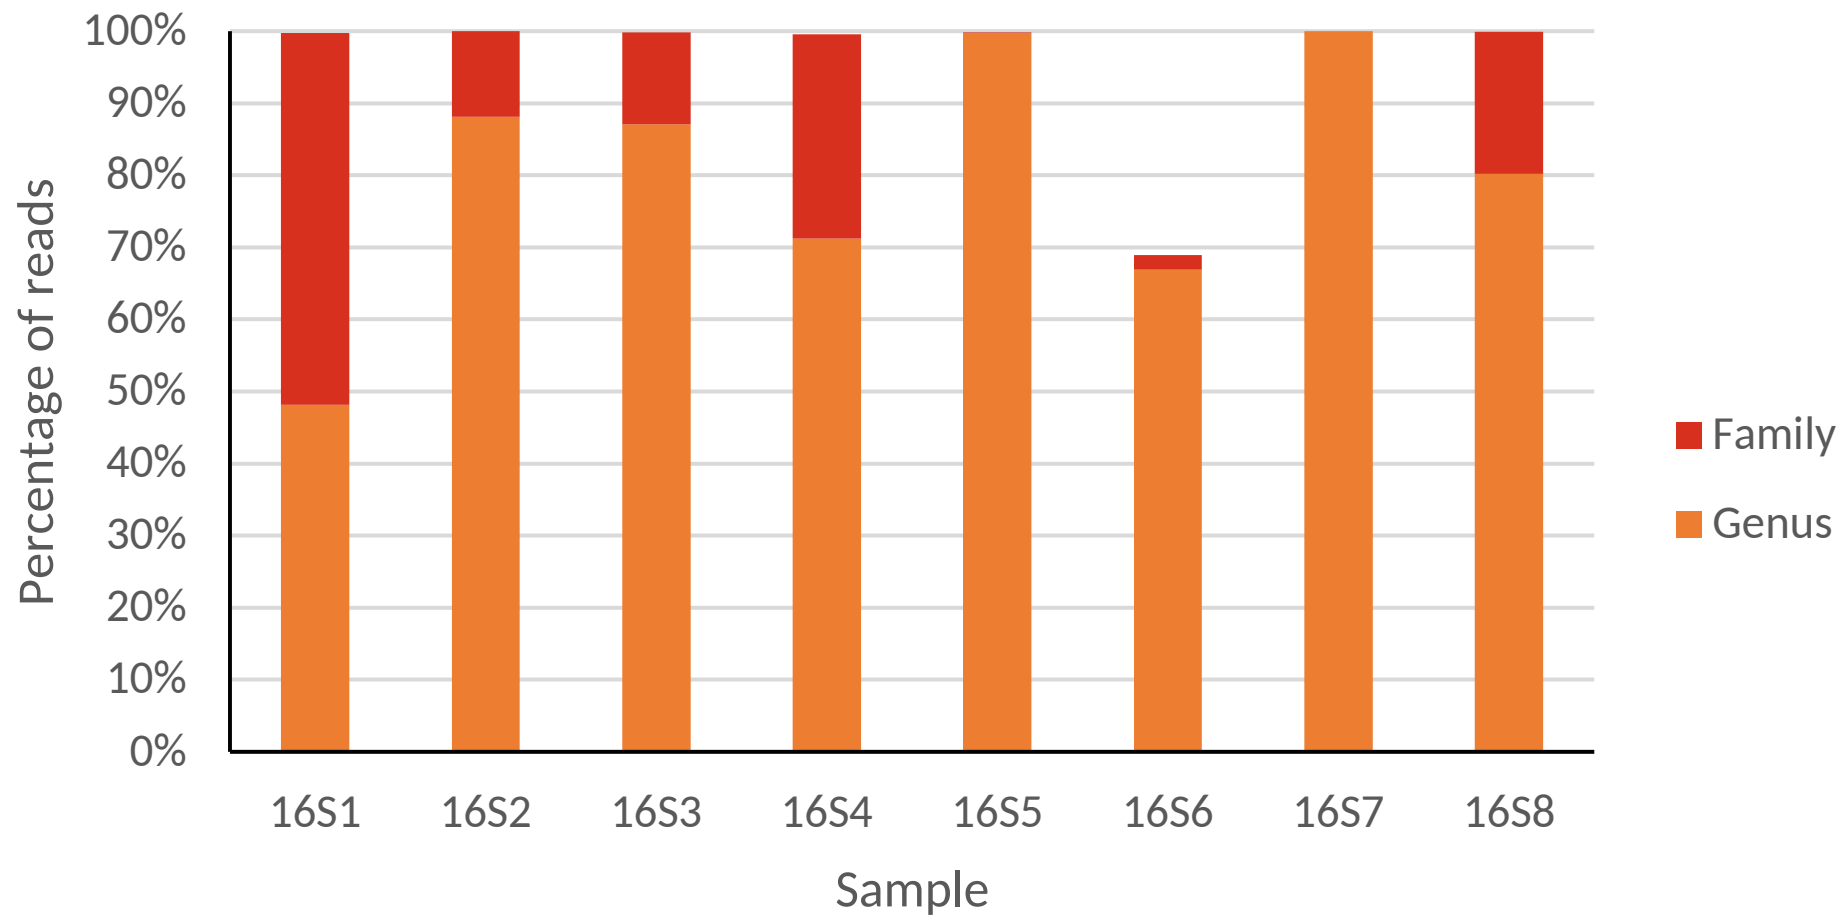

B

Correctly classified reads - NCBI 16S

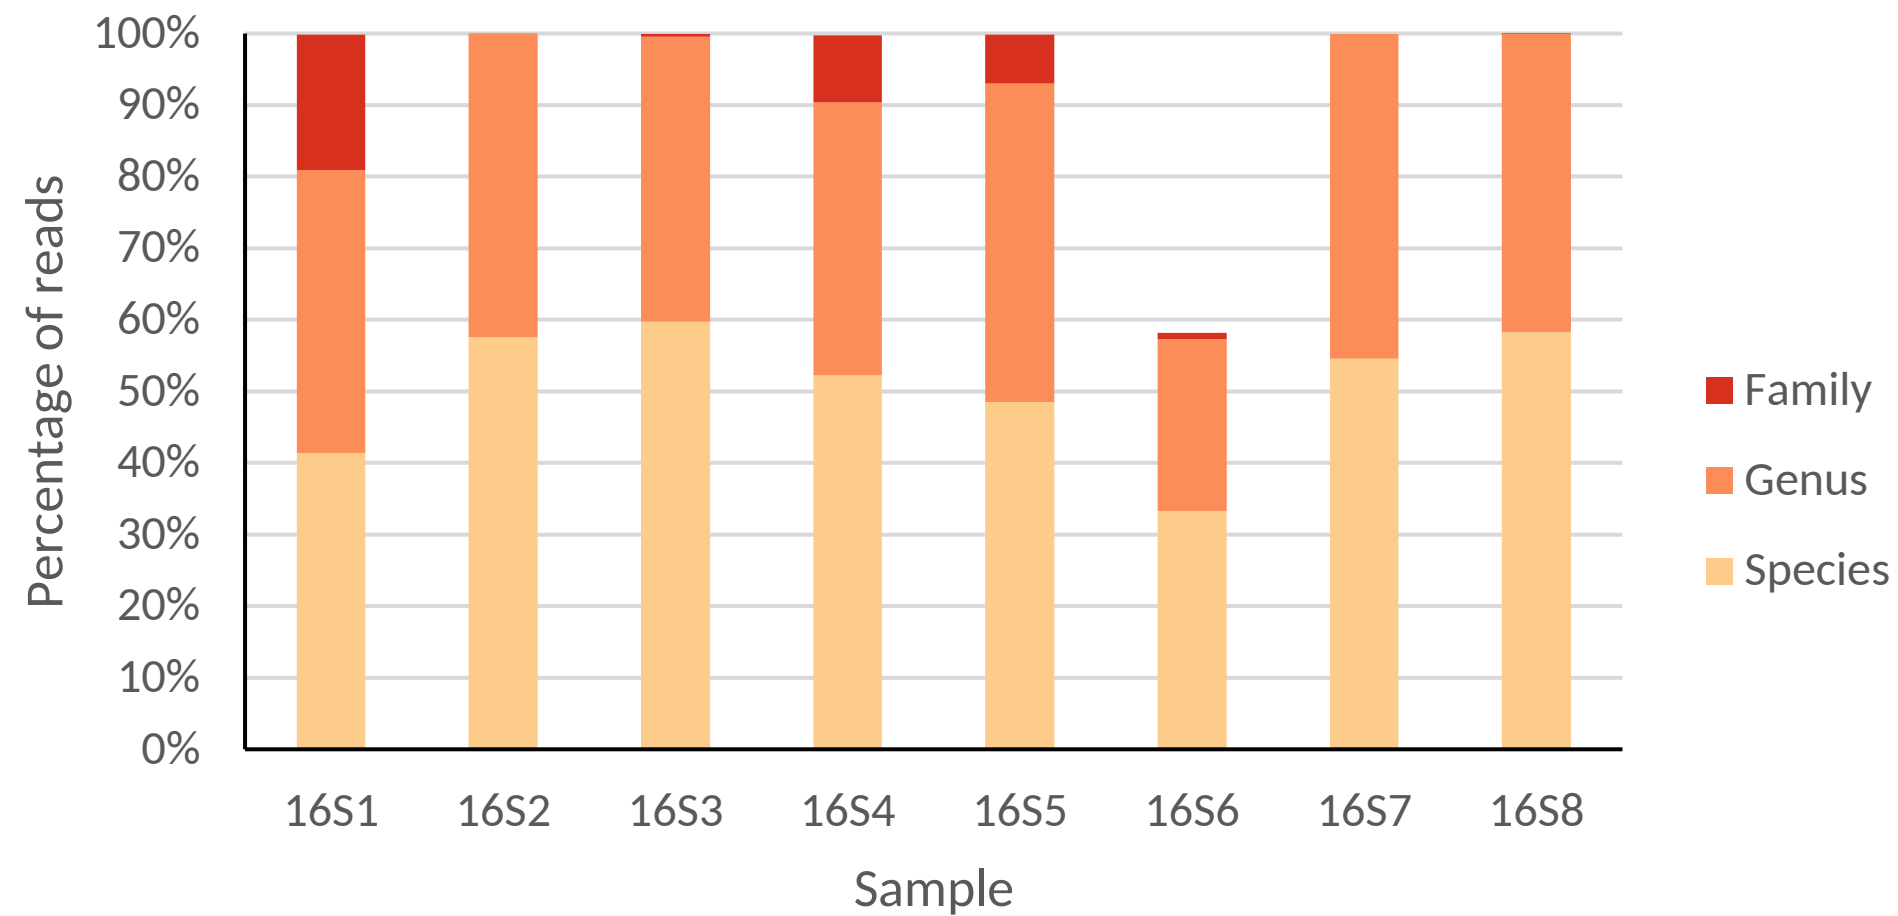

Supplement: s1 [file s1]
